# Supplementary material for: The Use of PET Imaging for Prognostic Integrin α2β1 Phenotyping to Detect Non-Small Cell Lung Cancer and Monitor Drug Resistance Responses
Source: PubMed Central journal article supplement — Theranostics. 2017 Sep 20;7(16):4013–28. doi: 10.7150/thno.19304 (PMC5667422; doi:10.7150/thno.19304), 2017-09-20
Supplement: thnov07p4013s1.pdf [file thnov07p4013s1.pdf]

# Supporting information for

## The use of PET imaging for prognostic integrin $\alpha_2\beta_1$ phenotyping to detect non-small cell lung cancer and monitor drug resistance responses

Chiun-Wei Huang<sup>1</sup>, Wen-Chuan Hsieh<sup>1†</sup>, Shih-Ting Hsu<sup>1†</sup>, Yi-Wen Lin<sup>1</sup>, Yi-Hsiu Chung<sup>1</sup>, Wen-Chi Chang<sup>1</sup>, Han Chiu<sup>1</sup>, Yun Han Lin<sup>1</sup>, Chung-Pu Wu<sup>2,3,4,5</sup>, Tzu-Chen Yen<sup>1,6\*</sup> and Feng-Ting Huang<sup>7\*</sup>

### Author Affiliations:

<sup>1</sup>Center for Advanced Molecular Imaging and Translation (CAMIT), Chang Gung Memorial Hospital, Tao-yuan, Taiwan;

<sup>2</sup>Graduate Institute of Biomedical Sciences, <sup>3</sup>Department of Physiology and Pharmacology, and

<sup>4</sup>Molecular Medicine Research Center, College of Medicine, Chang Gung University, Tao-Yuan, Taiwan;

<sup>5</sup>Department of Neurosurgery, Chang Gung Memorial Hospital, Tao-Yuan, Taiwan;

<sup>6</sup>Department of Nuclear Medicine, Chang Gung Memorial Hospital, Taoyuan, Taiwan;

<sup>7</sup>Department of Biochemical Science and Technology, College of Life Science, National Taiwan University, Taipei, Taiwan.

† Wen-Chuan Hsieh and Shih-Ting Hsu contributed equally to this work.

### \* Corresponding Authors:

Tzu-Chen Yen, M.D. Ph.D.

Department of Nuclear Medicine

Chang Gung Memorial Hospital

No. 5, Fu-Hsin St., Kweishan, Taoyuan, 33305 Taiwan

Tel.: 886-3-3281200 ext. 2744

Fax: 886-3-211-0052

E-mail: yen1110@cgmh.org.tw

Feng-Ting Huang, Ph.D.

Department of Biochemical Science and Technology

National Taiwan University

No. 1, Sec. 4, Roosevelt Rd., Taipei 10617, Taiwan

Tel.: 886-2-3366-4083

Fax: 886-2-3366-2271

E-mail: fthuang@ntu.edu.tw

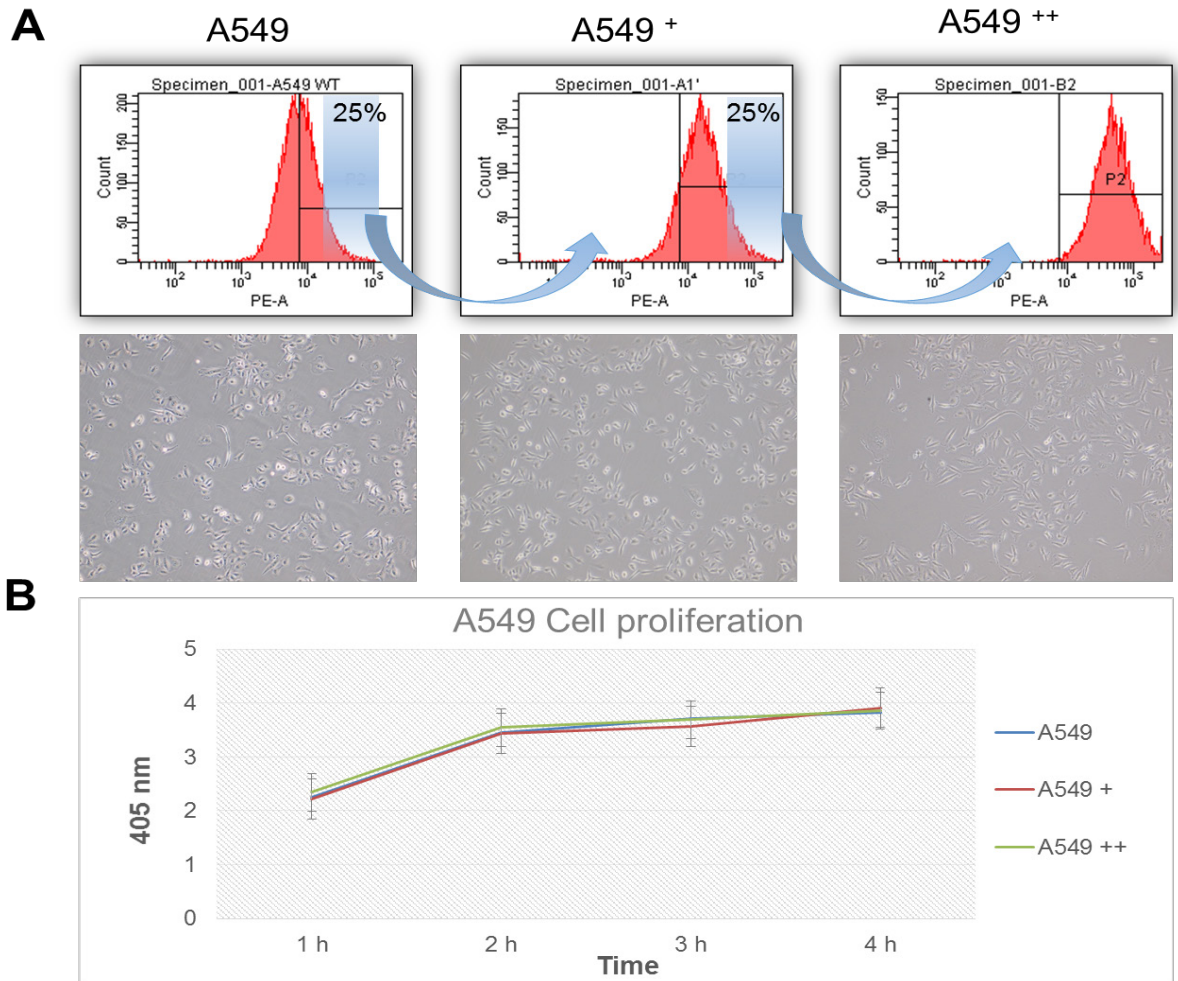

**Figure S1. The integrin  $\alpha_2\beta_1$  expression level and proliferation of A549- and A549-derived cell lines.**

(A) Sorting of cells that highly express integrin  $\alpha_2\beta_1$  using FACS. The subpopulation of A549 cells showing strong integrin  $\alpha_2\beta_1$  antibody (ab24697; ab30484, Abcam) staining (top 25%) were selected, collected and expanded for second-round selection by FACS. The subline from the first-round selection was designated A549<sup>+</sup>, and the subline from the next round of selection was designated A549<sup>++</sup>. Experimental data were analyzed with Flowjo7.2.2 software. (B) The proliferation of the A549, A549<sup>+</sup> and A549<sup>++</sup> cells was validated by CCK8 assay, which indicated no significant differences among these cell lines.

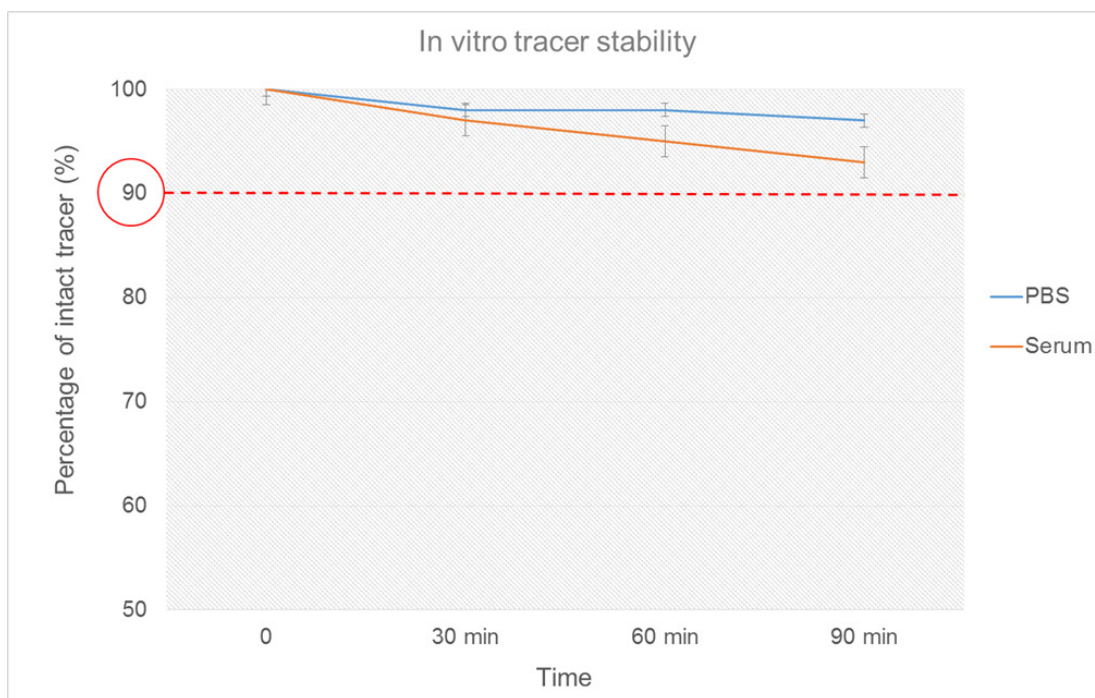

**Figure S2.** *In vitro* assessment of the stability of  $^{68}\text{Ga}$ -DOTA-A2B1 in PBS (pH 7.4) and mouse serum at physiological temperature. After 1.5 h, the percentage of intact peptide probes remained greater than 90% in both conditions, as verified by radio-HPLC profiles.

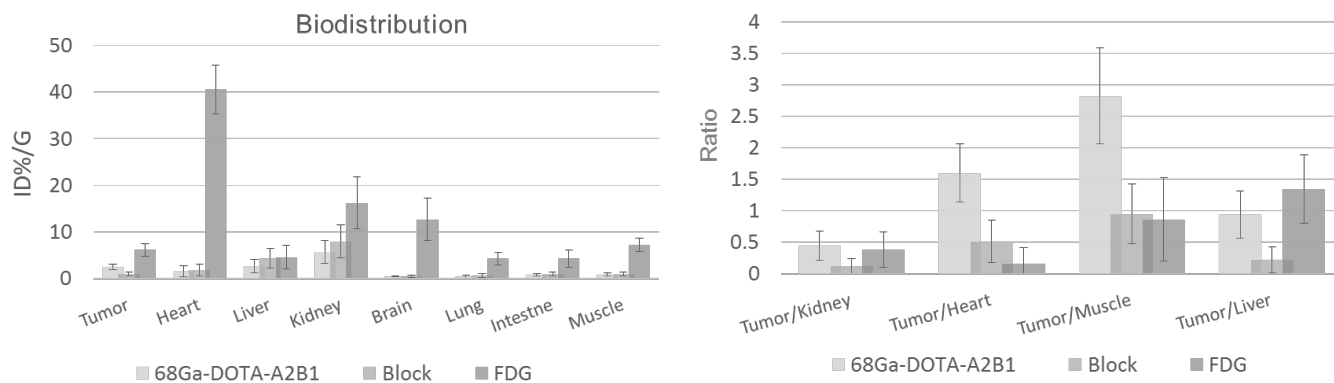

**Figure S3. *Ex vivo* biodistribution data of the integrin tracer <sup>68</sup>Ga-DOTA-A2B1, <sup>68</sup>Ga-DOTA-A2B1-Block and <sup>18</sup>F-FDG.** After administration of the tracers, the tissues were collected, weighed, and counted; the results are presented as % ID/g  $\pm$  SD (n = 3).

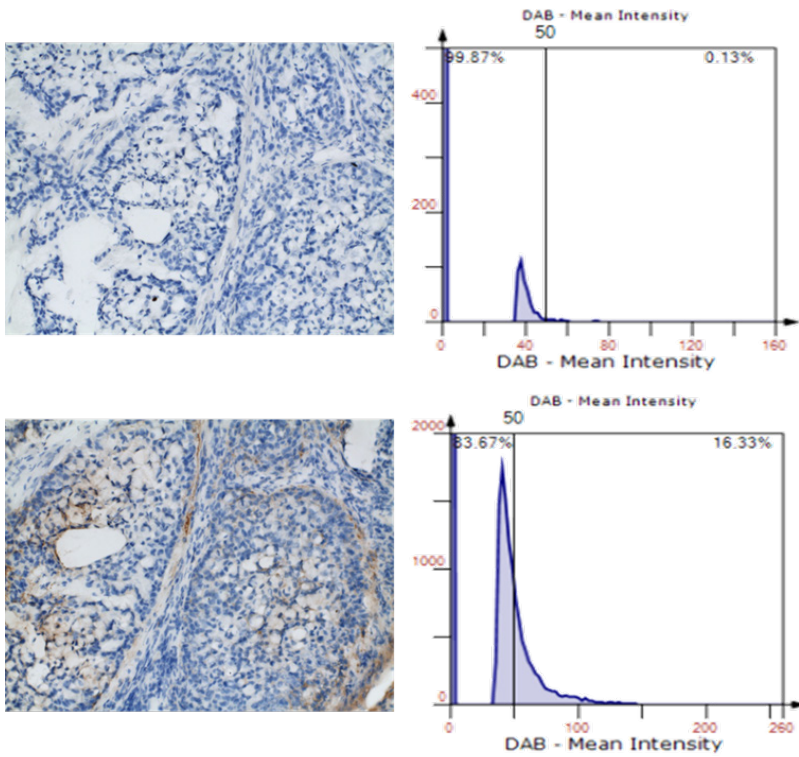

**Figure S4. The histological results of dissected subcutaneous A549 tumors.** Immunostaining of lung tumor tissue with an  $\alpha$ -integrin  $\alpha_2$  antibody demonstrated that after A549 cells were inoculated into a living animal, integrin  $\alpha_2\beta_1$  was still highly expressed in the xenografts.

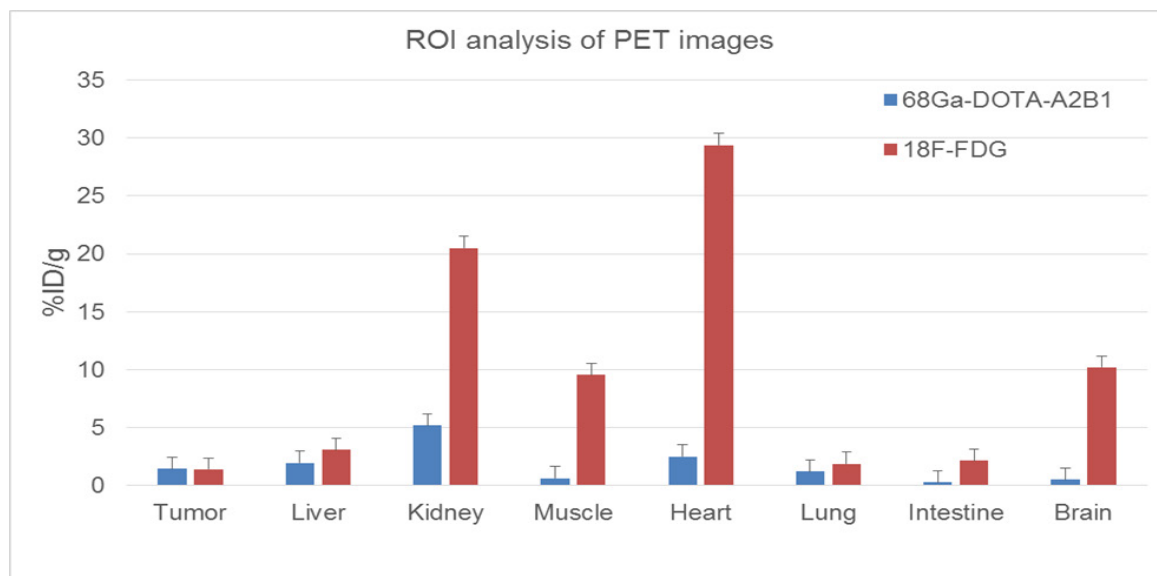

**Figure S5. ROI analysis of PET images of the orthotopic A549 xenograft animal model.** Blue bars,  $n = 5$  for  $^{68}\text{Ga}$ -DOTA-A2B1, and red bars,  $n = 5$  for  $^{18}\text{F}$ -FDG; major organs were compared, and the data are reported as the means  $\pm$  SEM.  $*p < 0.001$  compared with all organs.

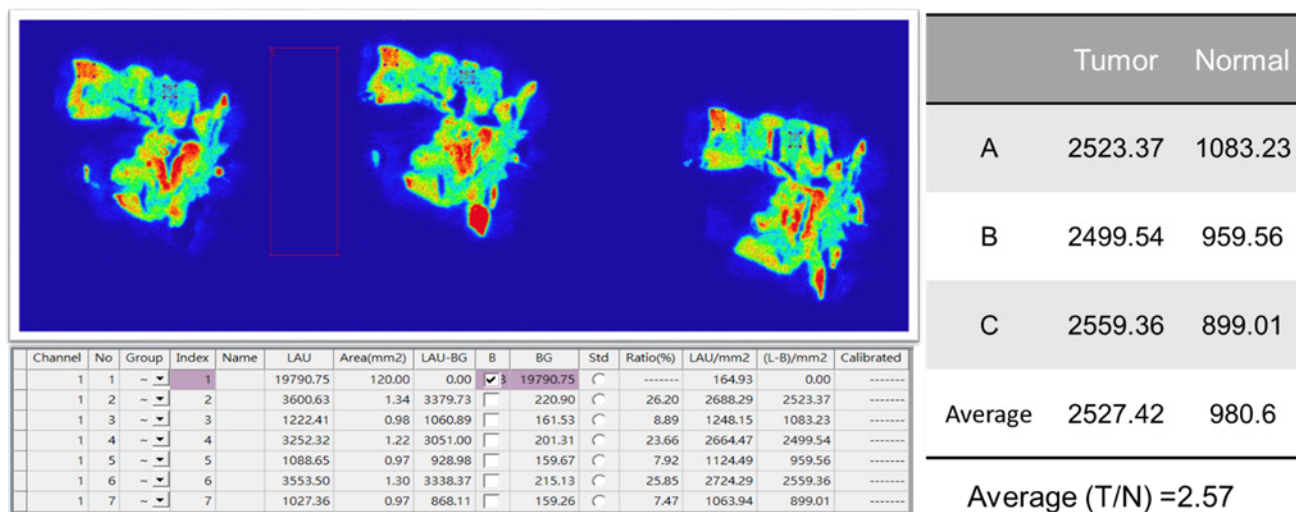

**Figure S6. *Ex vivo* high-resolution autoradiography of the orthotopic lung cancer model after injection of  $^{18}\text{F}$ -FDG tracers.** (A) Representative autoradiographs of the lung after injection of  $^{18}\text{F}$ -FDG. Arrows indicate tumor lesions. Autoradiographs acquired from 40- $\mu\text{m}$  tissue slices 60 min after injection of  $^{18}\text{F}$ -FDG radiotracer. (B) From the semi-quantitative results, the T/N ratio was calculated as 2.57.

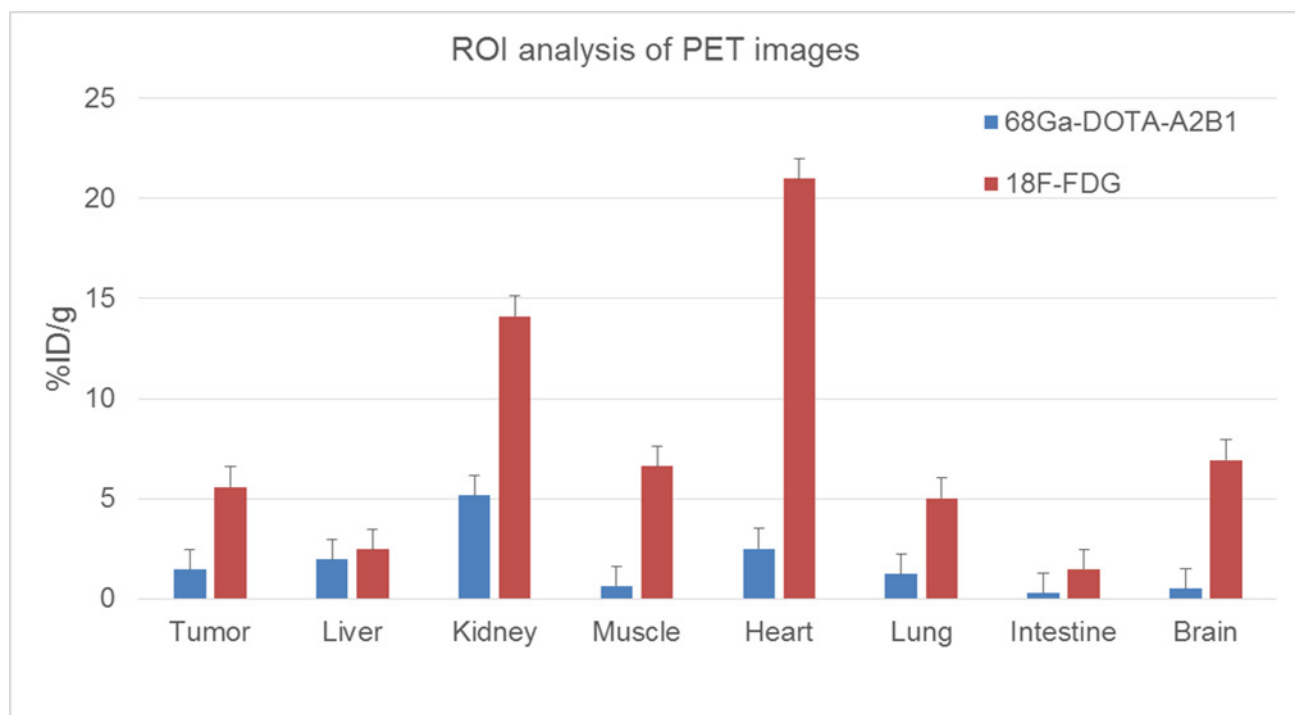

**Figure S7. Comparison of uptake of intravenously injected <sup>68</sup>Ga-DOTA-A2B1 and <sup>18</sup>F-FDG in animals with osseous tumors (blue bars, n = 5 for <sup>68</sup>Ga-DOTA-A2B1, and red bars, n = 5 for <sup>18</sup>F-FDG) injected intravenously.** Statistical significance was determined with a 2-tailed Student's *t*-test. For all graphs, data are represented as the means ± SEM. \**p* < 0.001 compared with all organs.

**Table S1.** The Gallium ( $^{68}\text{Ga}$ )-labeled tracer should meet the “Quality Control Result (reference: European Pharmacopoeia 8<sup>th</sup> edition)” before release for any preclinical or clinical PET scan studies.

**Quality Control Result**  
**Gallium ( $^{68}\text{Ga}$ )-DOTA-A2B1 Injection**

| No. | Items                                                                               | Release Limit                                                                       | Result                        |
|-----|-------------------------------------------------------------------------------------|-------------------------------------------------------------------------------------|-------------------------------|
| 01  | Appearance                                                                          | Clear, particulate free                                                             | Pass                          |
| 02  | Ethanol Content                                                                     | $\leq 10\%$                                                                         | Pass                          |
| 03  | pH                                                                                  | $4.0 < \text{pH} < 8.0$                                                             | pH = 6.5                      |
| 04  | Radiochemical purity                                                                | $\geq 91\%$                                                                         | RCP: 100%                     |
| 05  | Impurity                                                                            | $\leq 3.33 \mu\text{g/mL}$                                                          | Pass                          |
| 06  | Chemical identity (API)                                                             | $\text{RRT} = 1.3 \pm 0.13$                                                         | $\text{RRT} = 1.37$           |
| 07  | Radiochemical impurity<br>( $^{68}\text{Ga(III)}$ ion)                              | $\leq 2\%$                                                                          | 0%                            |
| 08  | Radiochemical impurity<br>( $^{68}\text{Ga}$ in colloidal form)                     | $\leq 3\%$                                                                          | 0%                            |
| 09  | Radionuclidic identity<br>( $^{68}\text{Ga}$ )                                      | $62 \text{ min} \leq T_{1/2} \leq 74 \text{ min}$                                   | $T_{1/2} = 66.66 \text{ min}$ |
| 10  | Strength                                                                            | $\geq 0.33 \text{ mCi/mL}$                                                          | 15mCi/mL                      |
| 11  | Radionuclidic Purity                                                                | $\geq 99.9\%$ ub 0.511 MeV.<br>1.077MeV, 1.022MeV.<br>1.883 MeV and Compton scatter | Purity: 100%                  |
| 12  | Radionuclidic impurity<br>(Retain the preparation to be examd<br>for at least 48 h) | Radionuclidic<br>Impurities $\leq 0.001\%$                                          | 0%                            |
| 13  | Bacterial endotoxin                                                                 | $\leq 11.6 \text{ EU/mL}$                                                           | < 10 EU/mL                    |
| 14  | Sterility                                                                           | Meet the requirements of the test                                                   | Pass                          |
|     |                                                                                     |                                                                                     |                               |
